# Supplementary material for: Mps1 dimerization and multisite interactions with Ndc80 complex enable responsive spindle assembly checkpoint signaling
Source: J Mol Cell Biol. 2020 Mar 26;12(7):486–98. doi: 10.1093/jmcb/mjaa006 (PMC7493027; doi:10.1093/jmcb/mjaa006)
Supplement: JMCB-2019-0409_R2_Supplementary_Material_mjaa006 [file jmcb-2019-0409_r2_supplementary_material_mjaa006.pdf]

## Supplementary Materials and Methods

### Plasmids and Mutagenesis

PrimeSTAR DNA polymerase (Takara Biomedical Technology) was used to amplify different cDNA fragments. GFP-tagged full-length Mps1 and different Mps1 truncations were generated by inserting the corresponding PCR-amplified fragments into pEGFP-C1 vector via BglII and SalI sites. GFP-tagged Mps1 truncations construct Mps1<sup>NTE-CTE</sup> was generated by inserting Mps1<sup>192-300</sup> PCR-amplified fragments into GFP-Mps1<sup>1-61</sup> plasmid via SalI and BamHI sites. GFP-Mps1<sup>N300-FKBP</sup> plasmid was generated by inserting FKBP12 PCR-amplified fragment into GFP-Mps1<sup>N300</sup> via BamHI site. For different constructs expressing Maltose binding protein (MBP) tagged Mps1 truncation proteins with a C-terminal 6×His-tag, different PCR-amplified Mps1 fragments were inserted into the pET30a-MBP expression vector (a gift from Prof. Tengchuan Jin, USTC, China) by NotI and XhoI. LAP-Mps1 plasmid is a gift from Prof. Geert J.P.L. Kops. (Hubrecht institute, the Netherlands). GFP-ZW10 plasmid was described previously (Wang et al., 2004).

For LacO-LacI ectopic recruitment experiments, different pmCherry-LacI-Mps1 plasmids were generated by sequentially inserting LacI cDNA into pmCherry-C2 vector using BglII and SalI sites and insert different Mps1 cDNA using SalI and BamHI sites. For bimolecular fluorescence complementation experiments, different Mps1 fragments were inserted into a vector expressing N-terminal EGFP<sup>1-155</sup> fragment and another vector expressing N-terminal EGFP<sup>156-238</sup> fragment.

Mutagenesis was performed using Mut Express II fast mutagenesis kit (Vazyme Biotech Co. Ltd) according to the manufacturer's instructions. All constructs were verified by sequencing.

## **Immunofluorescence microscopy, image processing and quantification**

Unless indicated specifically, HeLa cells grown on coverslips were fixed and permeabilized simultaneously with PTEMF buffer (50 mM PIPES, pH6.8, 0.2% Triton X-100, 10 mM EGTA, 1 mM MgCl<sub>2</sub>, 3.7% Formaldehyde) at room temperature and processed for indirect immunofluorescence microscopy. Samples were examined on a DeltaVision microscope (GE Life Sciences), with optical sections acquired 0.25  $\mu$ m apart in the Z-axis. Deconvolved images from each focal plane were projected into a single picture using Softworx (GE Life Sciences). Images were taken at identical exposure times within each experiment, acquired as 8-bit gray scale images. After deconvolution, the images were exported as 24-bit RGB images and processed in Adobe Photoshop. Images shown in the same panel have been identically scaled. Measurement of kinetochore intensities was performed in ImageJ on non-deconvolved images. Quantification of the level of kinetochore-associated protein was conducted as described previously (Dou et al., 2015). In brief, the average pixel intensities from at least 20 kinetochore pairs from each cell were measured, and background pixel intensities were subtracted. The pixel intensities at each kinetochore pair were then normalized against ACA pixel values to account for any variations in staining or image acquisition. In all plots, each dot represents one cell. All *p*-values were calculated using the Student's *t*-test with the Prism software (GraphPad).

## **Western Blot**

Samples were separated by standard SDS-PAGE electrophoresis, then transferred to nitrocellulose membranes. Western blotting was performed using standard protocols. For all Western blotting, signals were detected using HRP-conjugated anti-mouse or anti-rabbit antibodies (Pierce) through an Amersham Imager 600 machine.

## Recombinant protein expression and GST pull-down assay

Different glutathione S-transferase (GST) fusion proteins were expressed in bacteria BL21-Gold(DE3) strain and purified by using glutathione agarose as reported previously (Zhao et al., 2019). GST-Ndc80<sup>Bonsai</sup>, and GST-Ndc80<sup>Bonsai $\Delta$ N</sup> fusion proteins were purified as previously described (Ciferri et al., 2008). Different MBP-Mps1-His<sub>6</sub> fusion proteins were purified using Ni-NTA beads (Qiagen) according to manufacturer's protocol. GST-tagged Ndc80<sup>Bonsai</sup> or Ndc80<sup>Bonsai $\Delta$ N</sup> fusion protein-bound glutathione beads were incubated with purified and eluted MBP-Mps1-His<sub>6</sub> fusion proteins in PBS buffer containing 0.1% Triton X-100 plus 1 mM PMSF and 1 mM DTT for 1 hour at 4°C. After the incubation, the beads were washed 3 times with PBS containing 0.1% Triton X-100 and once with PBS and boiled in SDS-PAGE sample buffer. The bound proteins were then separated on 10% SDS-PAGE. In parallel, the samples were analyzed by anti-MBP antibody using Western blot.

## Supplementary reference

- Ciferri, C., Pasqualato, S., Screpanti, E., et al. (2008). Implications for kinetochore-microtubule attachment from the structure of an engineered Ndc80 complex. *Cell* **133**, 427-439.
- Dou, Z., Liu, X., Wang, W., et al. (2015). Dynamic localization of Mps1 kinase to kinetochores is essential for accurate spindle microtubule attachment. *Proc Natl Acad Sci U S A* **112**, E4546-4555.
- Wang, H., Hu, X., Ding, X., et al. (2004). Human Zwint-1 specifies localization of Zeste White 10 to kinetochores and is essential for mitotic checkpoint signaling. *J Biol Chem* **279**, 54590-54598.
- Zhao, G., Cheng, Y., Gui, P., et al. (2019). Dynamic acetylation of the kinetochore-associated protein HEC1 ensures accurate microtubule-kinetochore attachment. *J Biol Chem* **294**, 576-592.

Figure S1

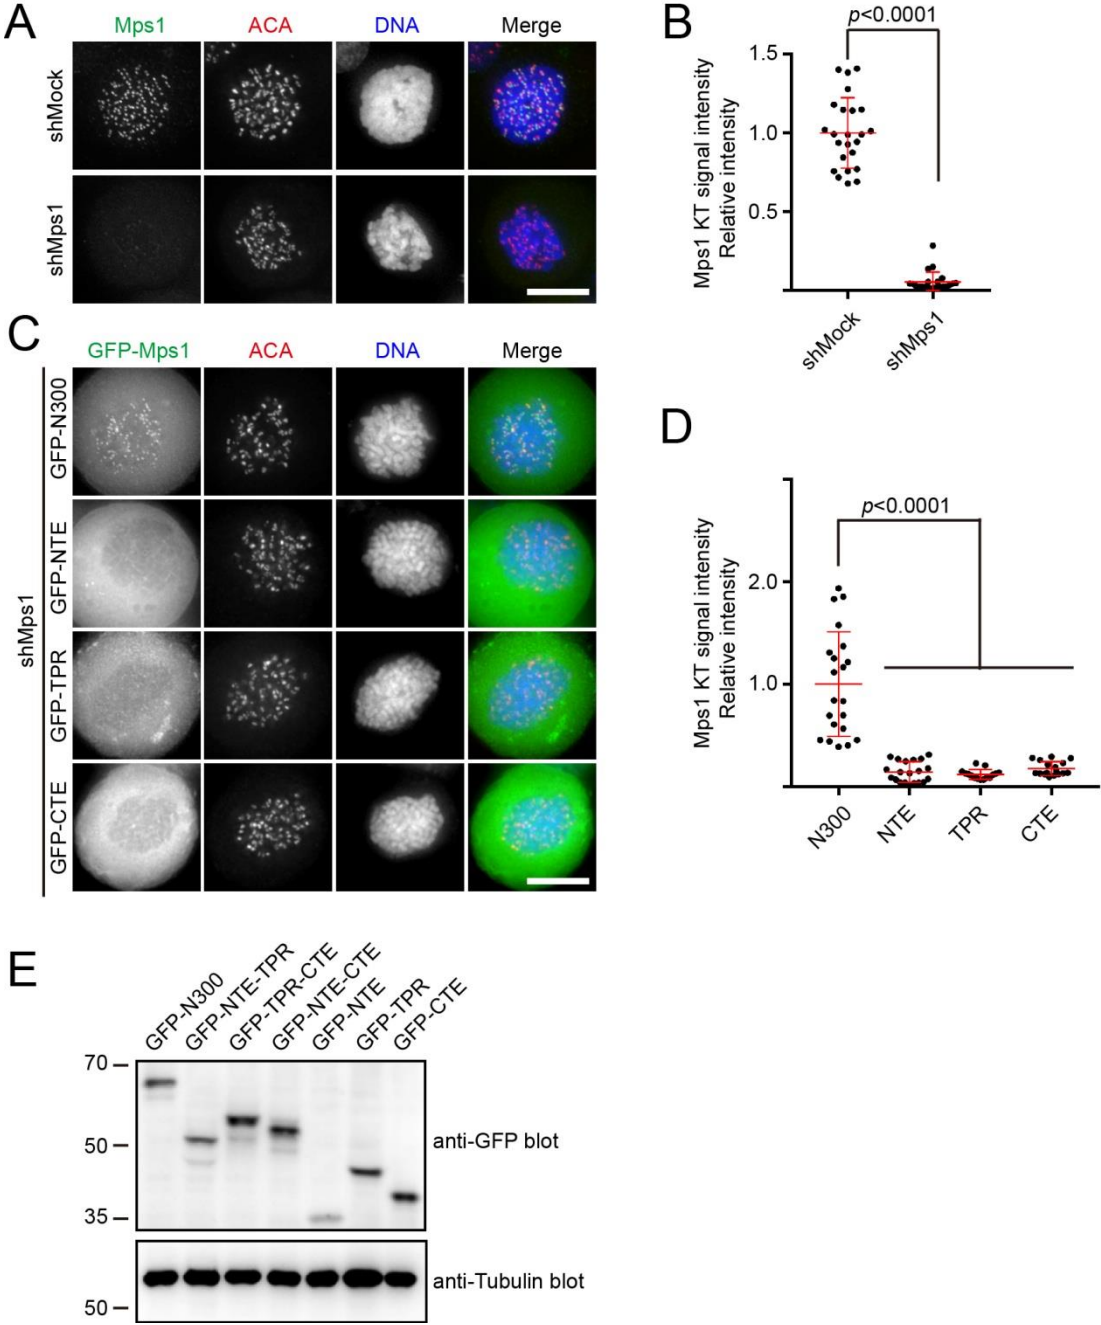

**Figure S1. Individual Mps1 kinetochore localization module fails to localize to kinetochore.**

(A) Representative immunofluorescence images of HeLa cells transfected with Mps1 shRNA or Mock shRNA. 36 hours post transfection, cells were treated with Nocodazole plus MG132 for 2 hours to enrich mitotic cells. Then cells were rinsed for 1 min with PHEM buffer (100 mM PIPES, 20 mM HEPES, pH 6.9, 5 mM EGTA, 2 mM MgCl<sub>2</sub>, and 4 M glycerol) and permeabilized for 1 min with PHEM buffer plus 0.1% Triton X-100. Extracted cells were then fixed in 3.7% formaldehyde in PHEM buffer and rinsed three times in PBS. Afterwards, cells were co-stained with ACA (red), Mps1 (green) and DNA (blue). Scale bar represents 10  $\mu$ m.

(B) Bar graph illustrating kinetochore intensity of Mps1 protein in cells treated as in A. Bars represent the mean kinetochore intensity ( $\pm$ SD) normalized to the values of shMock group (>30 cells from 3 independent experiments). Student's *t* test was used to calculate *p*-values.

(C, D) Representative images (C) and quantification (D) of HeLa cells expressing indicated GFP-Mps1 truncations. Before fixation, cells were treated with Nocodazole plus MG132 for 2 hours. Then cells were co-stained for ACA (red) and DNA (blue). Scale bar represents 10  $\mu$ m. Bars represent the mean kinetochore intensity ( $\pm$ SD) normalized to the values of GFP-Mps1-N300 group (>30 cells from 3 independent experiments). Student's *t* test was used to calculate *p*-values.

(E) Western blot showing the comparable expression of different Mps1 constructs as indicated. 24 hours after transfection into HeLa cells, cell lysates were prepared. After separation by SDS-PAGE, samples were probed with the indicated antibodies.

Figure S2

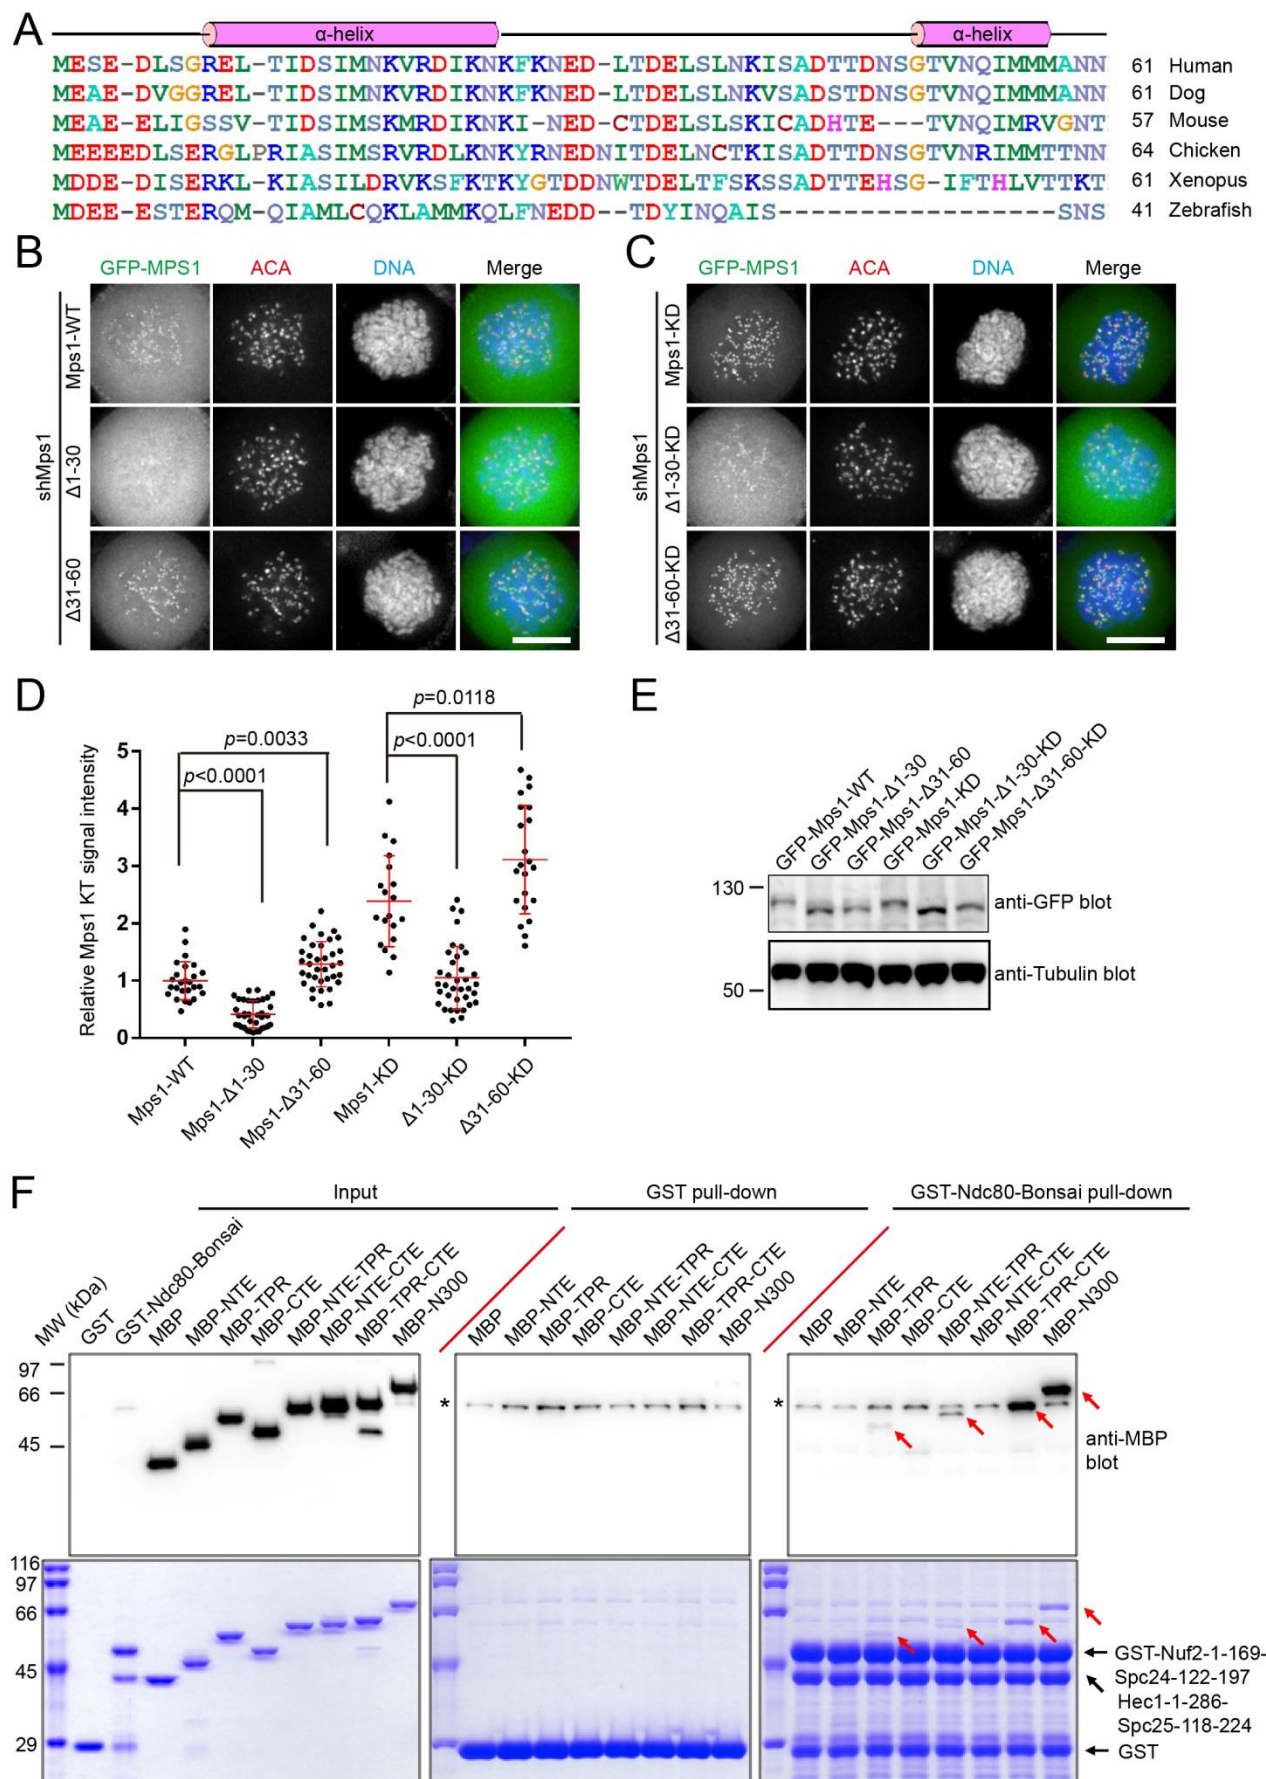

**Figure S2. The Multisite interactions between Mps1 and Ndc80C.**

(A) Multiple sequence alignment of the NTE region of Mps1 proteins from different species as indicated. The sequence alignment was done by ClustalW2 software. The secondary structure was predicted using PSIPRED online tool (<http://bioinf.cs.ucl.ac.uk/psipred/>).

(B, C) Representative immunofluorescence images of HeLa cells transfected with shMps1 and different shMps1 resistant GFP-Mps1 constructs as indicated. 36 hours post transfection, cells were treated with Nocodazole plus MG132 for 1 hour. Cells were then fixed and co-stained for ACA (red) and DNA (blue). Scale bar represents 10  $\mu$ m.

(D) Bar graph illustrating kinetochore intensity of different GFP-Mps1 proteins treated as in B and C. Bars represent the mean kinetochore intensity ( $\pm$ SD) normalized to the values of GFP-Mps1-WT group (>30 cells from 3 independent experiments). Student's *t* test was used to calculate *p*-values.

(E) Western blot showing the comparable expression of different Mps1 constructs as indicated. 24 hours after transfection into HeLa cells, cell lysates were prepared. After separation by SDS-PAGE, samples were probed with the indicated antibodies.

(F) GST- or GST-Ndc80<sup>Bonsai</sup>-bound agarose beads were used as affinity matrices to absorb different MBP-tagged Mps1 truncation proteins purified from *E. coli*. Pull-downs were analyzed by SDS-PAGE and probed by anti-MBP blotting.

Figure S3

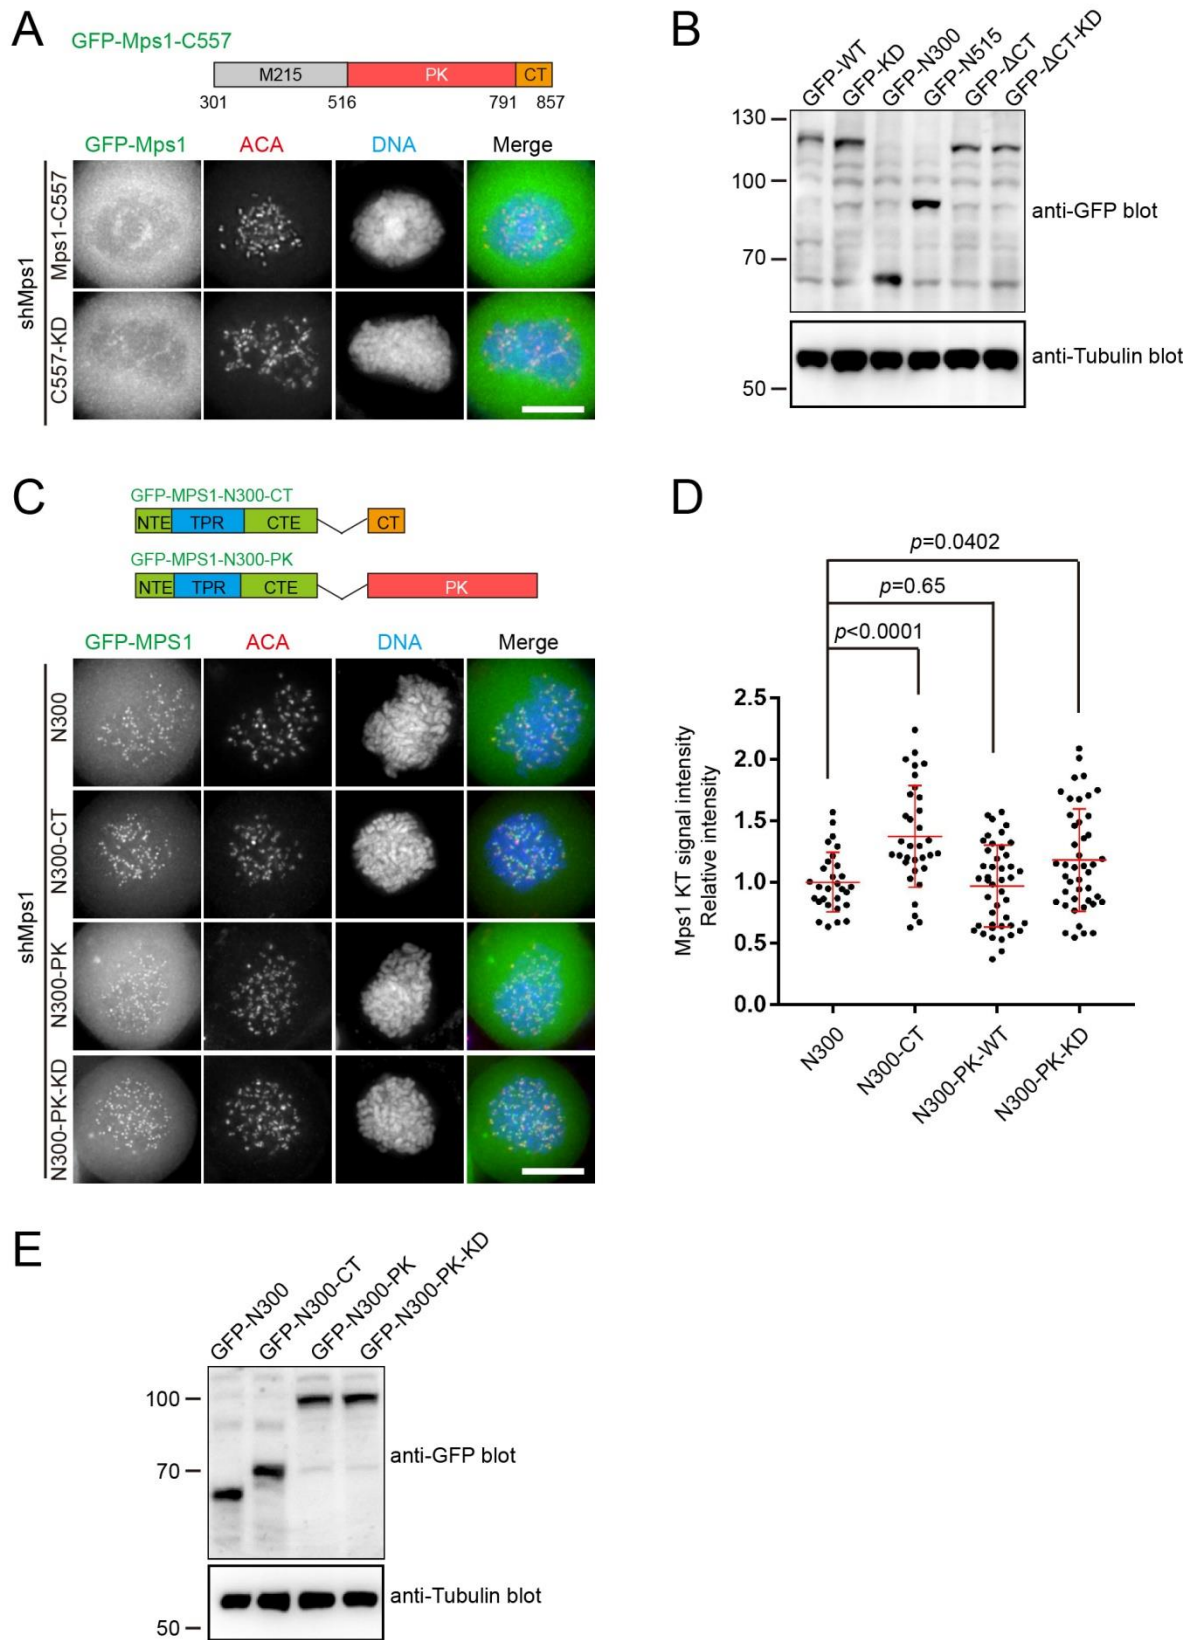

**Figure S3. Mps1 C-terminal fragment contributes to kinetochore localization.**

(A) Mps1<sup>C557</sup> fragment does not have kinetochore localization activity. Representative immunofluorescence images of HeLa cells transfected with shMps1 and GFP-Mps1<sup>C557-WT/KD</sup> constructs as indicated. 36 hours post transfection, cells were treated with Nocodazole plus MG132 for 2 hours. Then cells were fixed and co-stained for ACA (red) and DNA (blue). Scale bar represents 10  $\mu$ m.

(B and E) Western blot showing the comparable expression of different Mps1 constructs as indicated. 24 hours after transfection into HeLa cells, cell lysates were prepared. After separation by SDS-PAGE, samples were probed with the indicated antibodies.

(C) Mps1<sup>CT</sup> and Mps1<sup>PK</sup> fragments enhance kinetochore localization. Representative immunofluorescence images of HeLa cells transfected with shMps1 and different GFP-Mps1 constructs as indicated. 36 hours post transfection, cells were treated with Nocodazole plus MG132 for 2 hours. Then cells were fixed and co-stained for ACA (red) and DNA (blue). Scale bar represents 10  $\mu$ m.

(D) Bar graph illustrating kinetochore intensity of different GFP-Mps1 fusion proteins treated as in C. Bars represent the mean kinetochore intensity ( $\pm$ SD) normalized to the values of Mps1-N300 (>30 cells from 3 independent experiments). Student's *t* test was used to calculate *p*-values.

Figure S4

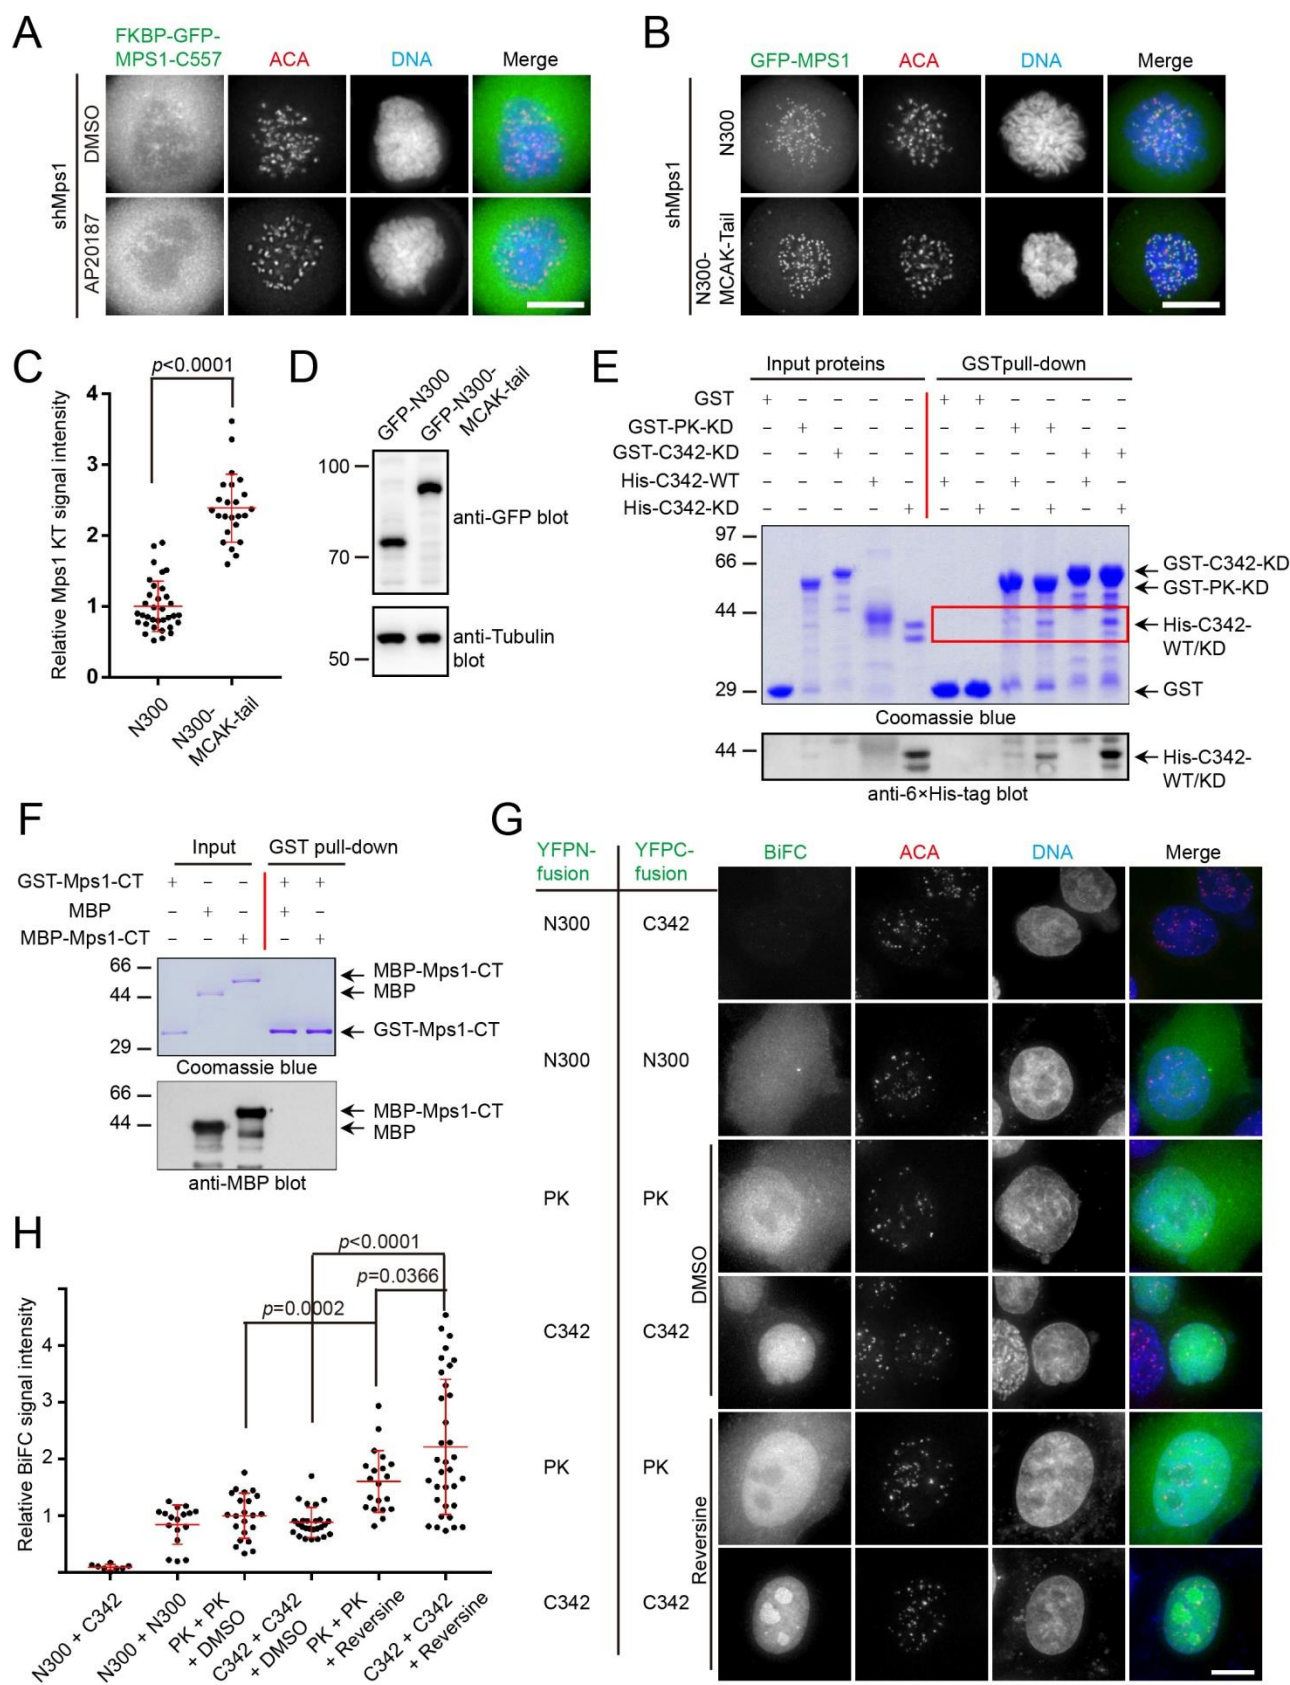

**Figure S4. Mps1 C-terminal fragment contributes to Mps1 dimerization.**

(A) Representative immunofluorescence images of HeLa cells transfected with shMps1 and shMps1 resistant FKBP-GFP-Mps1<sup>C557</sup>. 36 hours post transfection, cells were treated with Nocodazole plus MG132 for 2 hours. One group of cells was treated with AP20187 for 30 minutes. Then cells were fixed and co-stained for ACA (red) and DNA (blue). Scale bar represents 10  $\mu$ m.

(B) Representative images of HeLa cells transfected with shMps1 and shMps1 resistant GFP-Mps1<sup>N300</sup> or GFP-Mps1<sup>N300-MCAK-tail</sup> construct as indicated. 36 hours post transfection, cells were treated with Nocodazole plus MG132 for 2 hours. Then cells were fixed and co-stained for ACA (red) and DNA (blue). Scale bar represents 10  $\mu$ m.

(C) Bar graph illustrating kinetochore intensity of indicated fusion proteins treated as in B. Bars represent the mean kinetochore intensity ( $\pm$ SD) normalized to the values of GFP-Mps1<sup>N300</sup> (>30 cells from 3 independent experiments). Student's *t* test was used to calculate *p*-values.

(D) Western blot showing the comparable expression of different Mps1 constructs as indicated. 24 hours after transfection into HeLa cells, cell lysates were prepared. After separation by SDS-PAGE, samples were probed with the indicated antibodies.

(E) GST-, GST-Mps1<sup>PK-KD</sup>- or GST-Mps1<sup>C342-KD</sup>-bound agarose beads were used as affinity matrices to absorb 6 $\times$ His-tagged Mps1<sup>C342</sup> truncation proteins purified from *E. coli*. Pull-downs were analyzed by SDS-PAGE and probed by anti-His-tag blotting.

(F) GST-Mps1<sup>CT</sup>-bound agarose beads were used as affinity matrices to absorb MBP-tagged Mps1<sup>CT</sup> truncation proteins purified from *E. coli*. Pull-downs were analyzed by SDS-PAGE and probed by anti-MBP-tag blotting.

(G) BiFC experiment indicates Mps1<sup>C342</sup> fragment forms dimer. Representative immunofluorescence

images of HeLa cells co-expressing different YFPN- and YFPC-fusion constructs as indicated. 24 hours post transfection, cells were fixed and stained with ACA (red) and DAPI (blue). Scale bar represents 10  $\mu\text{m}$ .

(H) Bar graph illustrating BiFC signal intensity of cells treated as in G. Bars represent the mean signal intensity ( $\pm\text{SD}$ ) of cells analyzed ( $>30$  cells from 3 independent experiments). Each dot represents one cell. Student's  $t$  test was used to calculate  $p$ -values.

Figure. S5

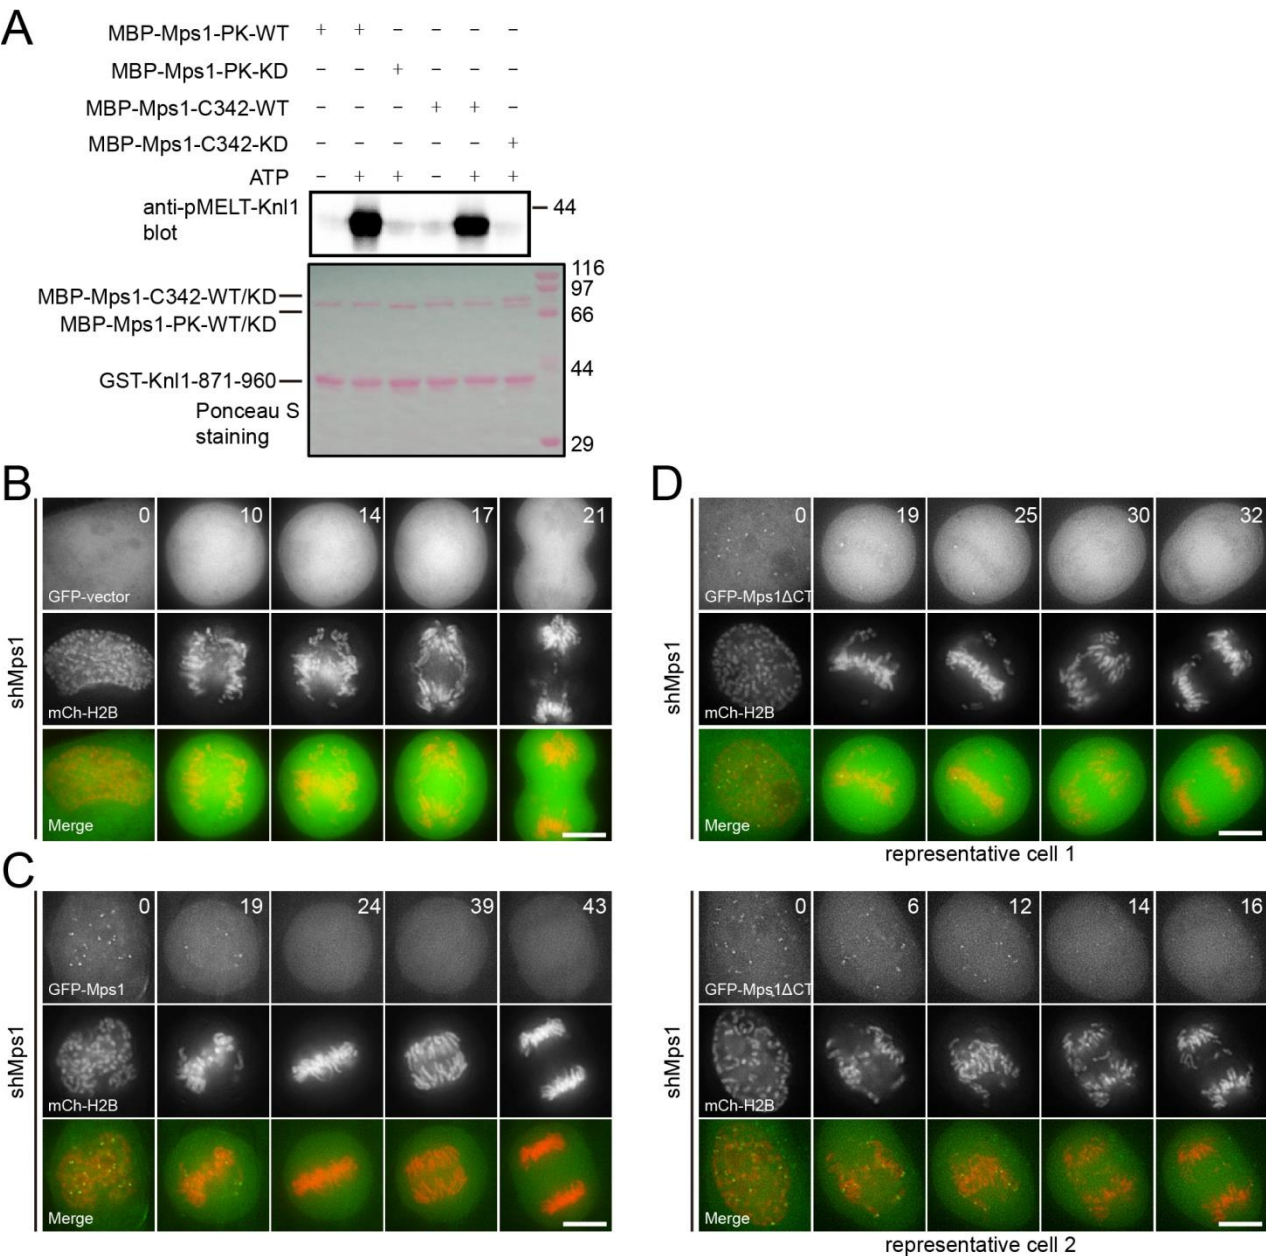

**Figure S5. Mps1 C-tail is required for the functional integrity of SAC.**

(A) *In vitro* phosphorylation of recombinant GST-Knl1<sup>871-960</sup> by different recombinant MBP-tagged Mps1 protein as indicated. After *in vitro* kinase reaction, the samples were analyzed by SDS-PAGE and Western blot. The upper panel shows the result of anti-pMELT-Knl1 blot and the lower panel shows Ponceau S staining of the transferred nitrocellulose membrane after SDS-PAGE electrophoresis.

(B, C and D) Representative stills illustrating mitotic progression in mCherry-H2B expressing cells depleted of endogenous Mps1 and rescued with GFP-vector (B), GFP-Mps1 (C) or GFP-Mps1<sup>ΔCT</sup> (D) construct. Images were acquired at the indicated time points after the start of nuclear envelope breakdown. Scale bar represents 10 μm.
